# Supplementary material
Source: PubMed Central journal article supplement (PMC2947877)
Supplement: 1011557107_Appendix.pdf [file 1011557107_Appendix.pdf]

## **Supporting Information**

### **Table of Contents**

#### **Supplementary Methods**

#### **Supplementary Tables**

**Table S1:** Prediction of the amino acid specificity of adenylation domains.

**Table S2:** Primers used in this study.

#### **Supplementary Figures**

**Fig. S1:** Translocase *MraY*-catalyzed reaction.

**Fig. S2:** Proposed biosynthetic pathway for 2*S*,3*S*-DABA.

**Fig. S3:** Proposed biosynthetic pathway for 3'-deoxy-4',5'-enamino-uridine.

**Fig. S4:** Comparison of two putative *pac* gene clusters from *S. coeruleorubidus* and *S. roseosporus*.

**Fig. S5:** Inactivation of *pacO*, *pacP*, *pacQ*, and *pacU* in *S. coeruleorubidus*.

**Fig. S6:** Extracted ion chromatograms of pacidamycins extracted from wide-type *S. coeruleorubidus* culture.

**Fig. S7:** Extracted ion chromatograms of pacidamycins extracted from culture of  $\Delta pacO$  mutant.

**Fig. S8:** Extracted ion chromatograms of pacidamycins extracted from culture of  $\Delta pacP$  mutant.

**Fig. S9:** Extracted ion chromatograms of pacidamycins extracted from culture of  $\Delta pacO$  mutant complemented by *pacO*.

**Fig. S10:** Extracted ion chromatograms of pacidamycins extracted from culture of  $\Delta pacQ$  mutant.

**Fig. S11:** Extracted ion chromatograms of pacidamycins extracted from culture of  $\Delta pacU$  mutant.

**Fig. S12:** SDS-PAGE analysis of the *E. coli* purified proteins.

**Fig. S13:** HRMS of the unlabeled and [<sup>13</sup>C]-labeled Ala-CO-Phe ureido dipeptide.

**Fig. S14:** HRMS of the unlabeled and [<sup>13</sup>C]-labeled Ala-CO-*m*-Tyr ureido dipeptide.

## Supplementary Methods

**Pacidamycin production and isolation.** For each gene deletion experiment, three mutants were selected for pacidamycin production analysis after PCR verification (primers listed in table S2). Wild-type *S. coeruleorubidus* was grown side by side as controls with all of the mutants. Starter cultures in TSB medium were inoculated with spores and incubated at 30 °C, 200 rpm for 24 h. Production medium (20 mL; 20.99 g/L MOPS, 10 g/L lactose, 4.41 g/L K<sub>2</sub>HPO<sub>4</sub>, 2.14 g/L NH<sub>4</sub>Cl, 0.6 g/L MgSO<sub>4</sub>, 10 mg/L FeSO<sub>4</sub>·2H<sub>2</sub>O, 10 mg/L MnCl<sub>2</sub>·4H<sub>2</sub>O, 10 mg/L ZnSO<sub>4</sub>·7H<sub>2</sub>O, 10 mg/L CaCl<sub>2</sub>, pH 7.0) was inoculated with starter culture (0.5 mL) and incubated at 30 °C, 200 rpm for 5 d. Pacidamycins were extracted from the cell-free broth (10 mL) using XAD-16 resin (5% v/v). The resin was washed with water (20 mL) and the extract was eluted with methanol (5 mL). The solvent was removed by a rotary evaporator and the residue was redissolved in water/methanol 1:1 (500 µL) and subjected to LC-HRMS analysis (25 µL injection).

**Cloning, overexpression and purification of NRPSs.** *pacH, J, L, N, O, P, U* were PCR amplified from genomic DNA extracted from *S. coeruleorubidus* (primers listed in table S2). Purified PCR products were ligated to pET-30 Xa/LIC (Novagen) following the standard protocol and confirmed by DNA sequencing. The resulting expression constructs were transformed into *E. coli* BL21 or BAP1 cells for protein expression. Expression and purification for all proteins followed the same general procedure and is detailed as follows. In 1 L of liquid culture, the cells were grown at 37 °C in LB medium with 50 µg/mL kanamycin to an OD<sub>600</sub> of 0.4. The cells were cooled on ice for 10 min and then induced with 0.1 mM isopropyl-β-D-thiogalactopyranoside (IPTG) for 16 h at 16 °C. The cells were harvested by centrifugation (6000 rpm, 6 min, 4 °C), resuspended in 30 mL lysis buffer (50 mM Tris-HCl pH 8.0, 0.5 M NaCl, 5 mM imidazole) and lysed by sonication on ice. Cellular debris was removed by ultracentrifugation (35000 rpm, 30 min, 4 °C). Ni-NTA agarose resin was added to the supernatant (1 mL/L of culture) and the solution was nutated at 4 °C for 1 h. The protein resin mixture was loaded into a gravity flow column, and proteins were eluted with increasing concentrations of imidazole in Buffer A (50 mM Tris-HCl, pH 8.0, 2 mM EDTA). Purified proteins were concentrated and buffer exchanged into Buffer A + 10% glycerol using Amicon Ultra filters. The final proteins were flash-frozen in liquid nitrogen and stored at -80 °C. The approximate protein yields were 16 mg/L for PacH (10 kDa), 6 mg/L for PacJ (8 kDa), 5 mg/L for PacL (90 kDa), 16 mg/L for PacN (63 kDa), 42 mg/L for PacO (57 kDa), 17 mg/L for PacP (90 kDa), and 3 mg/L for PacU (55 kDa).

### Supplementary Tables

**Table S1.** Prediction of the amino acid specificity of adenylation domains in pacidamycin cluster.

| <b>Protein</b> | <b>10 AA code</b> | <b>Predicted specificity</b> |
|----------------|-------------------|------------------------------|
| PacL           | DPGIYGQLAK        | Val/Leu                      |
| PacO           | DLSSVGVCYK        | Ala                          |
| PacP           | DIWQGTADDK        | Ser/Arg                      |
| PacU           | DCHYFALITK        | Pro/p-hydroxyphenylglycine   |

**Table S2.** Primers used in this study.

| <b>Primer</b> | <b>Sequence</b>                                                       | <b>Note</b>                                                                                           |
|---------------|-----------------------------------------------------------------------|-------------------------------------------------------------------------------------------------------|
| M119_F        | 5'-AGACCCTCGTGCTCGTCACG-3'                                            | Used for $\Delta pacO$ mutant construction; M119_R is also used for $\Delta pacO$ mutant verification |
| M119_R        | 5'-GGACCAACTGGAGTGGCAGC-3'                                            |                                                                                                       |
| M119-apra_F   | 5'-GCGTCGAGCCATCCTGAAACTCTGAGAGGCAAACCTATGAT<br>TCCGGGGATCCGTCGACC-3' |                                                                                                       |
| M119-apra_R   | 5'-GTACCTGTATACGCGCCATCCTGAACGACAGATGAATTATG<br>TAGGCTGGAGCTGCTTC-3'  |                                                                                                       |
| M120_F        | 5'-ACAAACGCTGAGCTACCGCG-3'                                            | Used for $\Delta pacP$ mutant construction                                                            |
| M120_R        | 5'-ACATTGCGGTGCTCGAACGC-3'                                            |                                                                                                       |
| M120-apra_F   | 5'-AGGCCGCGACTACGTTTCGGCCGAAAGGCTGGCACTGTGAT<br>TCCGGGGATCCGTCGACC-3' |                                                                                                       |
| M120-apra_R   | 5'-AGTCGTCGGGCGCTGCCGCAAGTCGACCGGTCAGTCTCATG<br>TAGGCTGGAGCTGCTTC-3'  |                                                                                                       |
| M121_F        | 5'-AAAAAATCTAGAGCTGCTGGCCGCGGAGAACG-3'                                | Used for $\Delta pacQ$ mutant construction                                                            |
| M121_R        | 5'-AAAAAAGAATTTCGTCCAGTGAGGCCGGGAAGG-3'                               |                                                                                                       |
| M121-apra_F   | 5'-AACGGCCATCGCGGCCACCCAGGAAGGCGGCACCCGGTGA<br>TTCCGGGGATCCGTCGACC-3' |                                                                                                       |
| M121-apra_R   | 5'-GGTCCCTGGCCGGCTGCTGGACGAGCTGCCGGCTCGTCATG<br>TAGGCTGGAGCTGCTTC-3'  |                                                                                                       |
| M125_F        | 5'-GCGAGATCGAGCAGGTGGTA-3'                                            | Used for $\Delta pacU$ mutant construction                                                            |
| M125_R        | 5'-GCGTCGTACAGCAGCATGGT-3'                                            |                                                                                                       |
| M125-apra_F   | 5'-CTGTTGCCGCACTTCCCCGCCGCCCTCACCCGCTGGATGATT<br>CCGGGGATCCGTCGACC-3' |                                                                                                       |
| M125-apra_R   | 5'-CTGGCTTCCGTCGCCTTACTGATGCCGACGCCTTGCTCATGT<br>AGGCTGGAGCTGCTTC-3'  |                                                                                                       |
| Apra_i        | 5'-AGTTGTCTCTGACACATTCT-3'                                            | Internal primer for mutants verification                                                              |
| 121_PET30R    | 5'-AGAGGAGAGTTAGAGCCTTATACGACTCCCCGGCCGTG-3'                          | External primer for $\Delta pacP$ mutant verification                                                 |
| 122_PET30R    | 5'-AGAGGAGAGTTAGAGCCTTATTGAAGATCATTACTTGGT-3'                         | External primer for $\Delta pacQ$ mutant verification                                                 |
| 126_PET30R    | 5'-AGAGGAGAGTTAGAGCCTTAGGCCTGGGGAGCGCCGTT-3'                          | External primer for $\Delta pacU$ mutant verification                                                 |
| 119c_NdeI     | 5'-AAAAAACATATGACCGGGTCTCCTTTTTGATA-3'                                | Used for <i>pacO</i> complementation                                                                  |
| 119c_EcoRI    | 5'-AAAAAAGAATTCTTAGGGGCGCCGAGTTCGGC-3'                                |                                                                                                       |
| 111a_PET30F   | 5'-GGTATTGAGGGTCGCATGAATCTACAGGATCAGAA-3'                             | Used for PacH expression                                                                              |
| 111a_PET30R   | 5'-AGAGGAGAGTTAGAGCCTTATTTCTGCTGCGTTCGCA-3'                           |                                                                                                       |
| 113_NdeI      | 5'-AAAAAACATATGTTTCGACGACGAGGGGCG-3'                                  | Used for PacJ expression                                                                              |
| 113_EcoRI     | 5'-AAAAAAGAATTTCGGGCGCGCTGATCCCTCATCGG-3'                             |                                                                                                       |
| 115_PET30F    | 5'-GGTATTGAGGGTCGCATGTTCGACCACAGATGACGC-3'                            | Used for PacL expression                                                                              |
| 115_PET30R    | 5'-AGAGGAGAGTTAGAGCCTTAGAGCATCGCCGCGAGCTCA-3'                         |                                                                                                       |
| 117_PET30F    | 5'-GGTATTGAGGGTCGCATGTTCCCGCTGAGCGCCTCA-3'                            | Used for PacN expression                                                                              |
| 117_PET30R    | 5'-AGAGGAGAGTTAGAGCCTTAACGCTGGAGGTCGGGGGTC-3'                         |                                                                                                       |
| 119_PET30F    | 5'-GGTATTGAGGGTCGCATGCGCGATGCAGTAGCCGC-3'                             | Used for PacO expression, <i>pacO</i> complementation verification                                    |
| 119_PET30R    | 5'-AGAGGAGAGTTAGAGCCTTAGGGGCGCCGAGTTCGGC-3'                           |                                                                                                       |

|             |                                               |                             |
|-------------|-----------------------------------------------|-----------------------------|
| 120_PET30F  | 5'-GGTATTGAGGGTCGCATGACGGAGCAGGTCGAGGCA-3'    | Used for PacP<br>expression |
| 120_PET30R  | 5'-AGAGGAGAGTTAGAGCCTTACCGGGTGCCGCCTTCCTGG-3' |                             |
| 125D_PET30F | 5'-GGTATTGAGGGTCGCATGTCTCTCACATTGGTCGA-3'     | Used for PacU<br>expression |
| 125_PET30R  | 5'-AGAGGAGAGTTAGAGCCTTAACCGGCCAACCCGCGCC-3'   |                             |

### Supplementary Figures

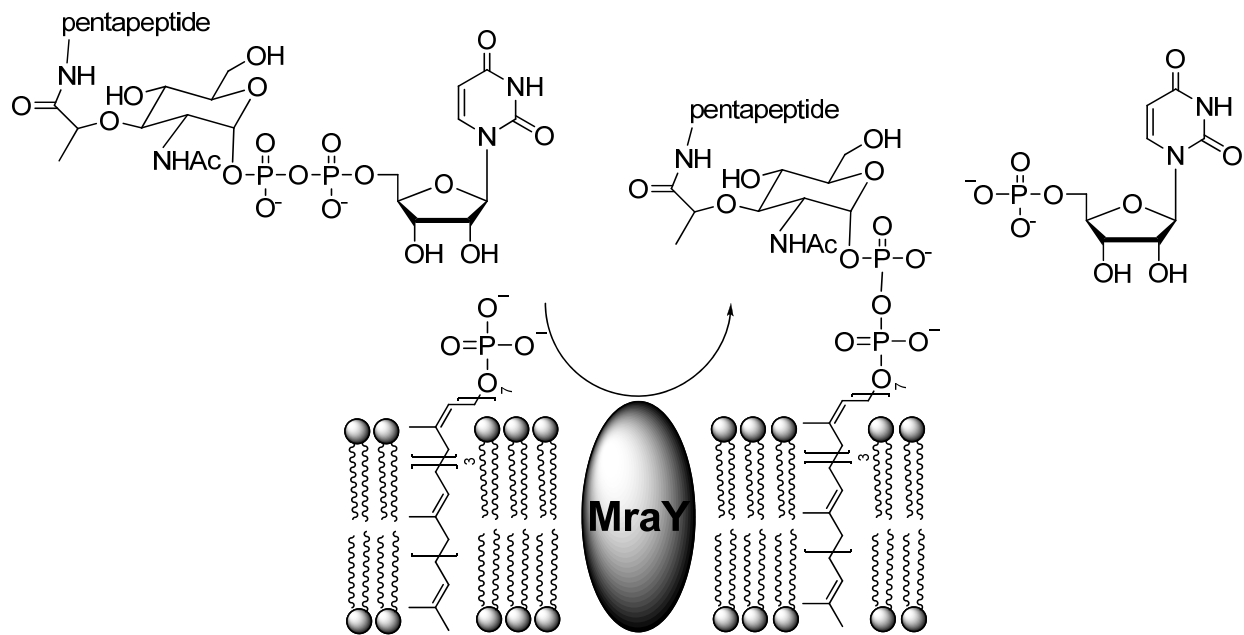

**Fig. S1.** Translocase MraY-catalyzed reaction: UDPMurNac-pentapeptide is cleaved to release UMP, and phospho-*N*-acetylmuramoyl-pentapeptide motif is transferred onto undecaprenyl phosphate carrier lipid to form lipid intermediate I during bacterial cell wall assembly.

**Q** argininosuccinate lyase

**S** fusion protein containing a PLP-dependent cysteine synthase and an argininosuccinate lyase

**T** PLP-dependent threonine aldolase

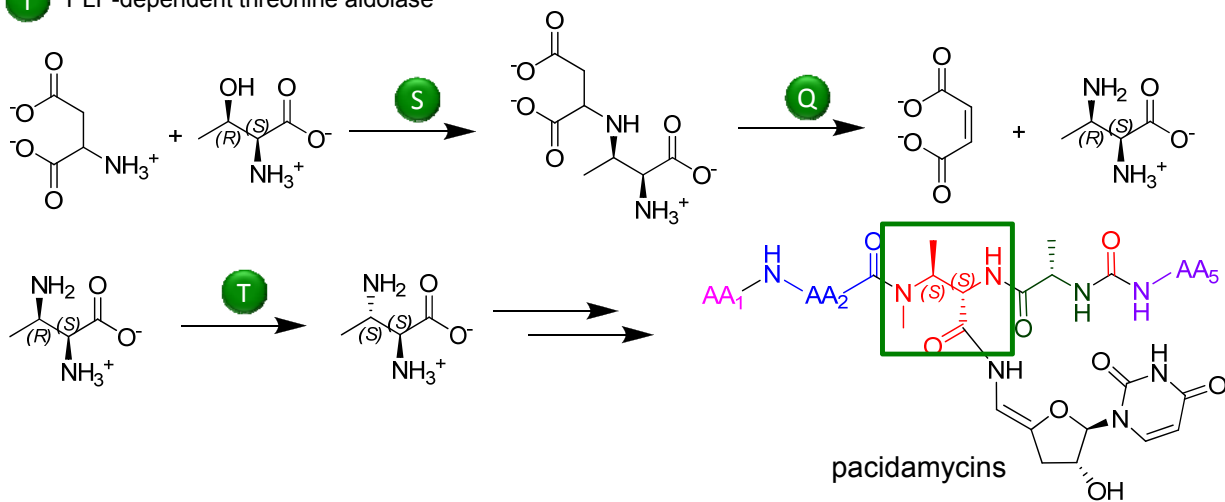

**Fig. S2.** Proposed biosynthetic pathway for 2S,3S-DABA.

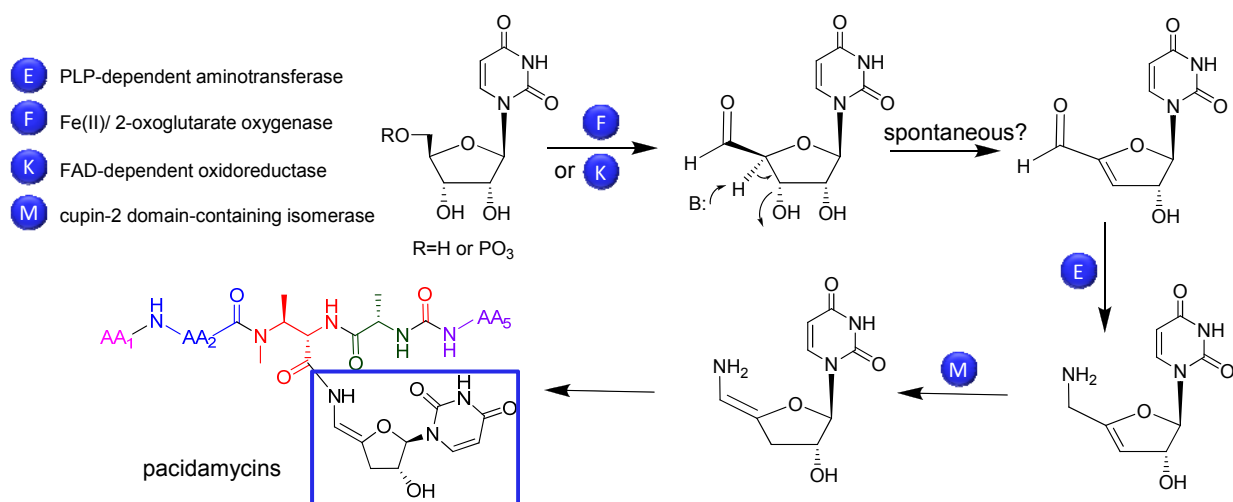

**Fig. S3.** Proposed biosynthetic pathway for 3'-deoxy-4',5'-enamino-uridine.



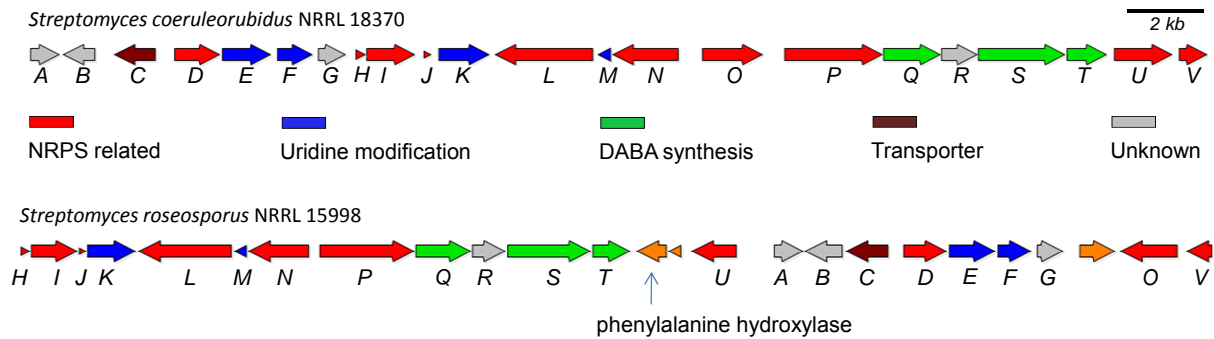

**Fig. S4.** Comparison of two putative *pac* gene clusters from *S. coeruleorubidus* and *S. roseosporus*. All *pac* genes identified from *S. coeruleorubidus* are present in *S. roseosporus*. Three additional genes are found in the cluster of *S. roseosporus*, one encoding a phenylalanine hydroxylase homolog and the other two encoding hypothetical proteins.

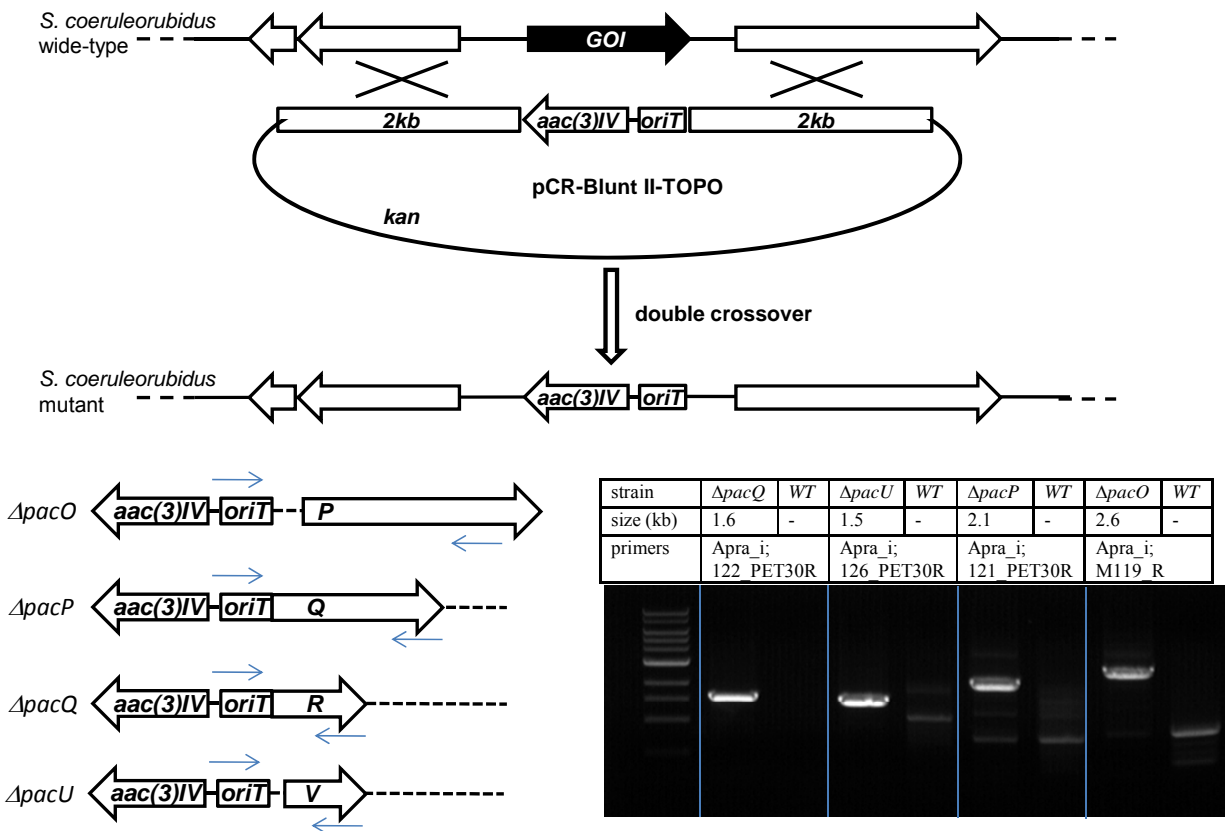

**Fig. S5.** Inactivation of *pacO*, *pacP*, *pacQ*, and *pacU* in *S. coeruleorubidus*. All genes were deleted in-frame by homologous recombination as illustrated above. The genomic DNA of wide-type and mutant strains was extracted and used as templates for subsequent PCR verification of mutants. PCR was carried out using one internal primer from *acc(3)IV-oriT* cassette and one external primer from an adjacent gene (Table S2). The size of PCR product was consistent with the expected size of each mutant.

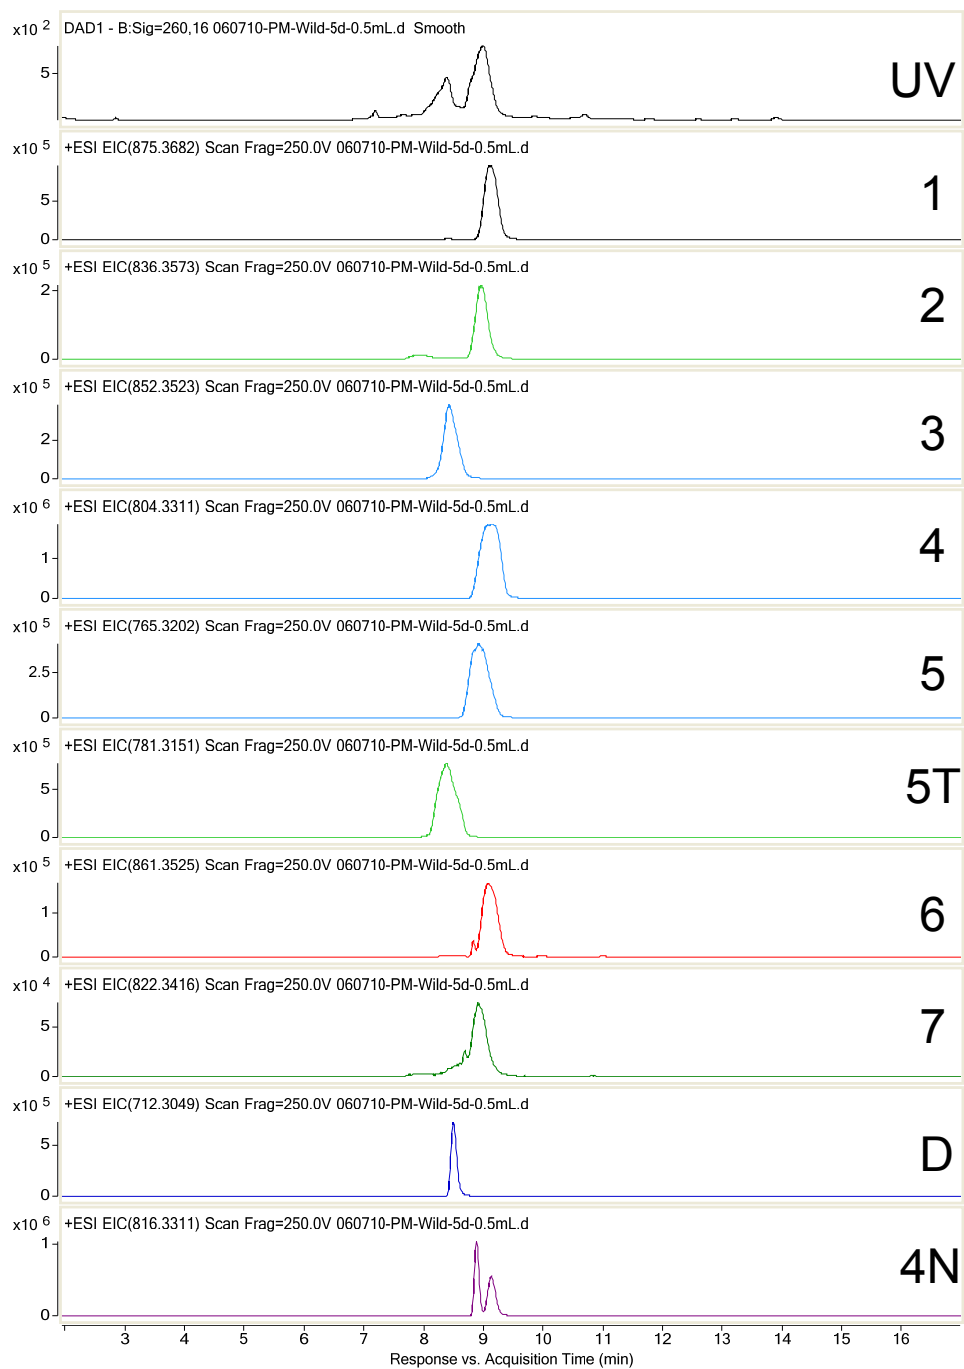

**Fig. S6.** Extracted ion chromatograms of pacidamycins extracted from wide-type *S. coeruleorubidus* culture.

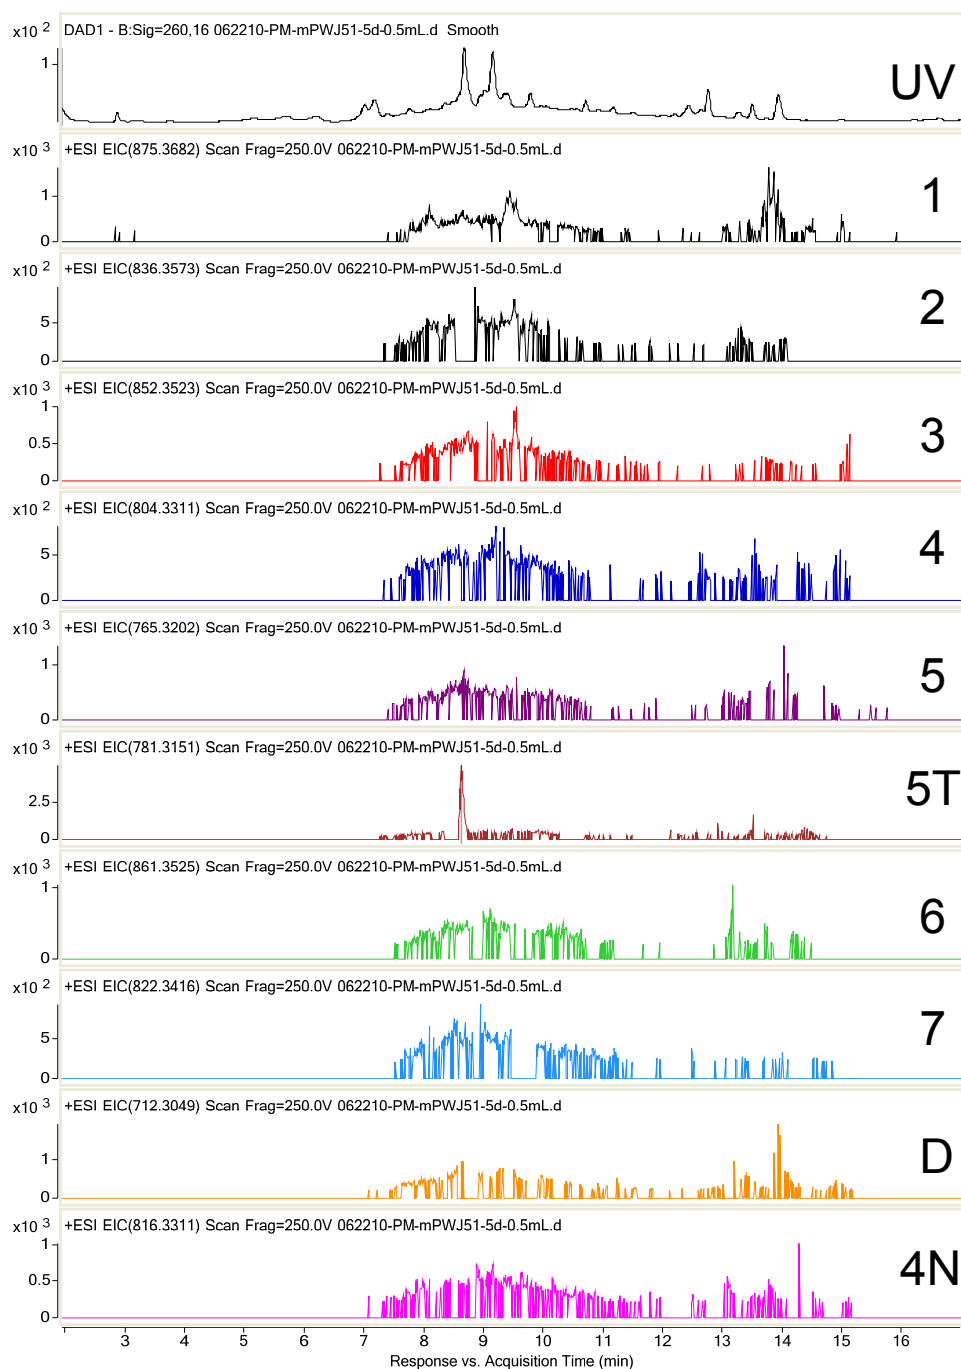

**Fig. S7.** Extracted ion chromatograms of pacidamycins extracted from culture of  $\Delta pacO$  mutant. The change in the y-axis of the mass signal scale (compared to Fig. S6) led to the appearance of mass noise.

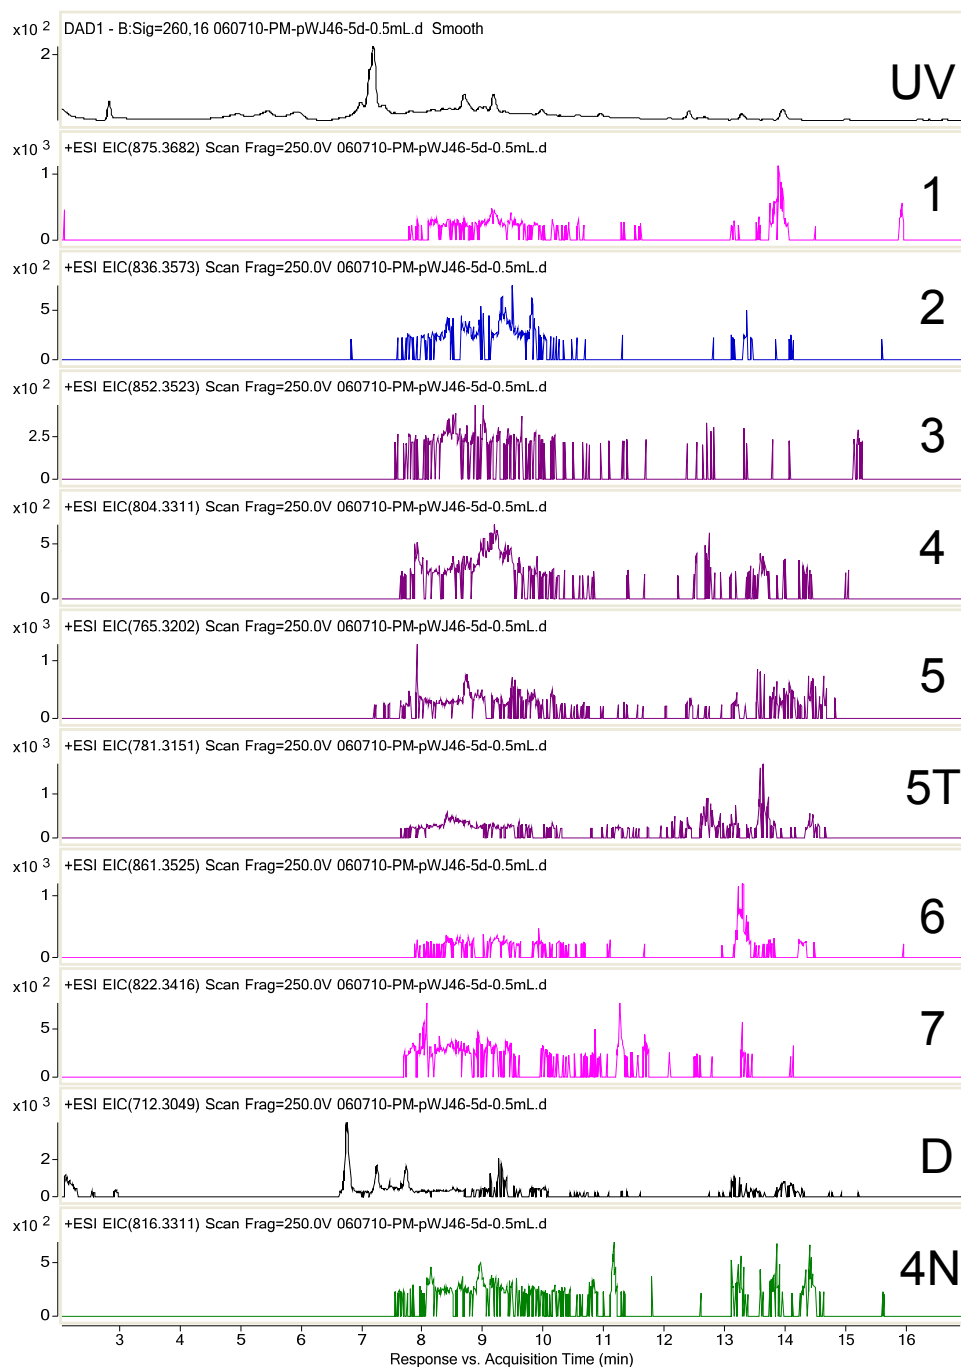

**Fig. S8.** Extracted ion chromatograms of pacidamycins extracted from culture of  $\Delta pacP$  mutant. The change in the y-axis of the mass signal scale (compared to Fig. S6) led to the appearance of mass noise.

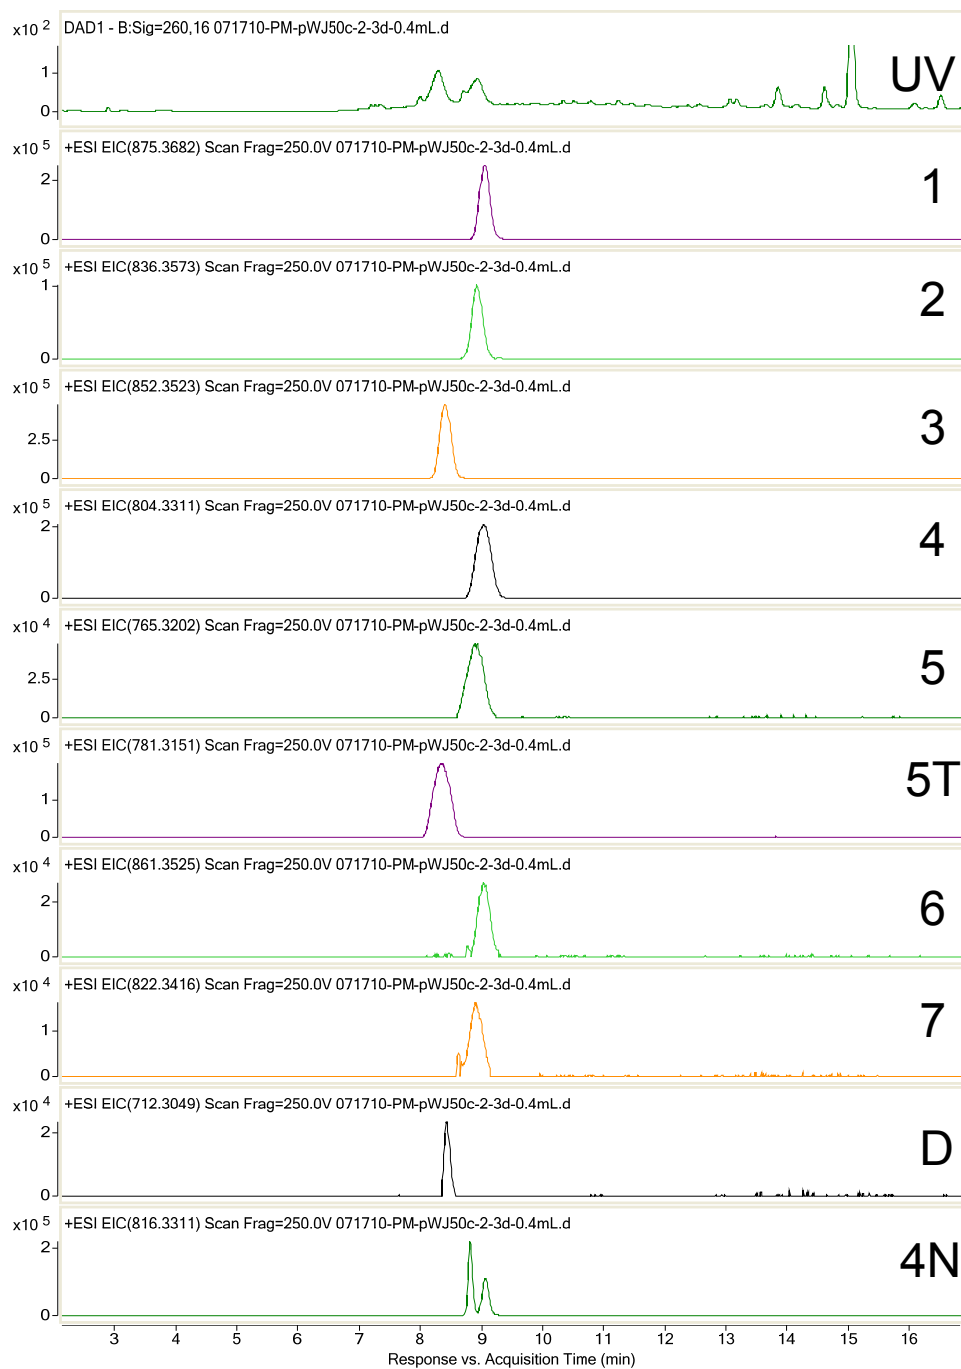

**Fig. S9.** Extracted ion chromatograms of pacidamycins extracted from culture of  $\Delta pacO$  mutant complemented by *pacO*.

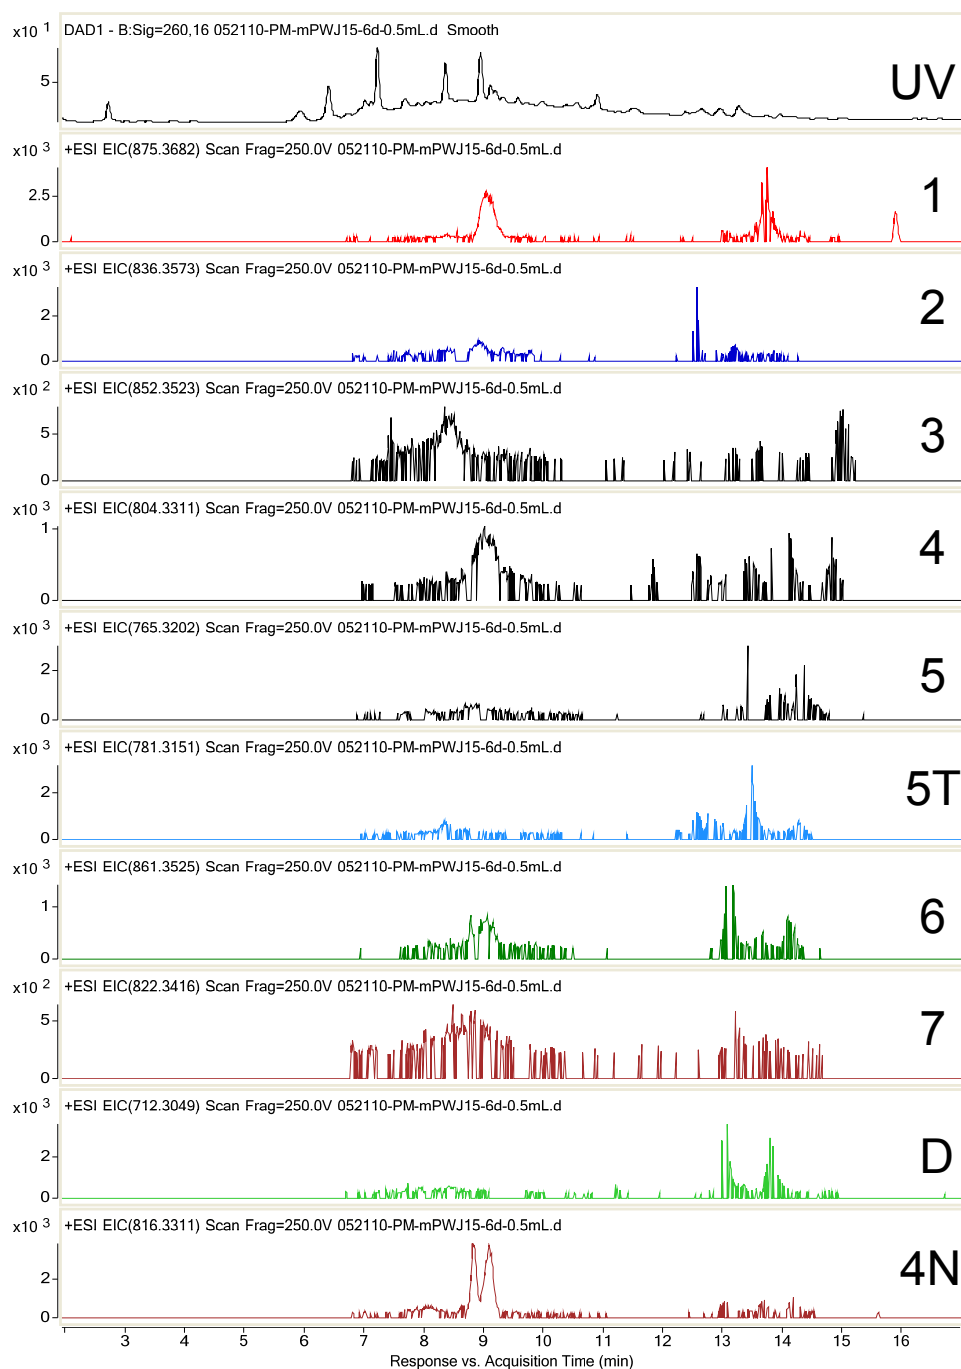

**Fig. S10.** Extracted ion chromatograms of pacidamycins extracted from culture of  $\Delta pacQ$  mutant. The change in the y-axis of the mass signal scale (compared to Fig. S6) led to the appearance of mass noise.

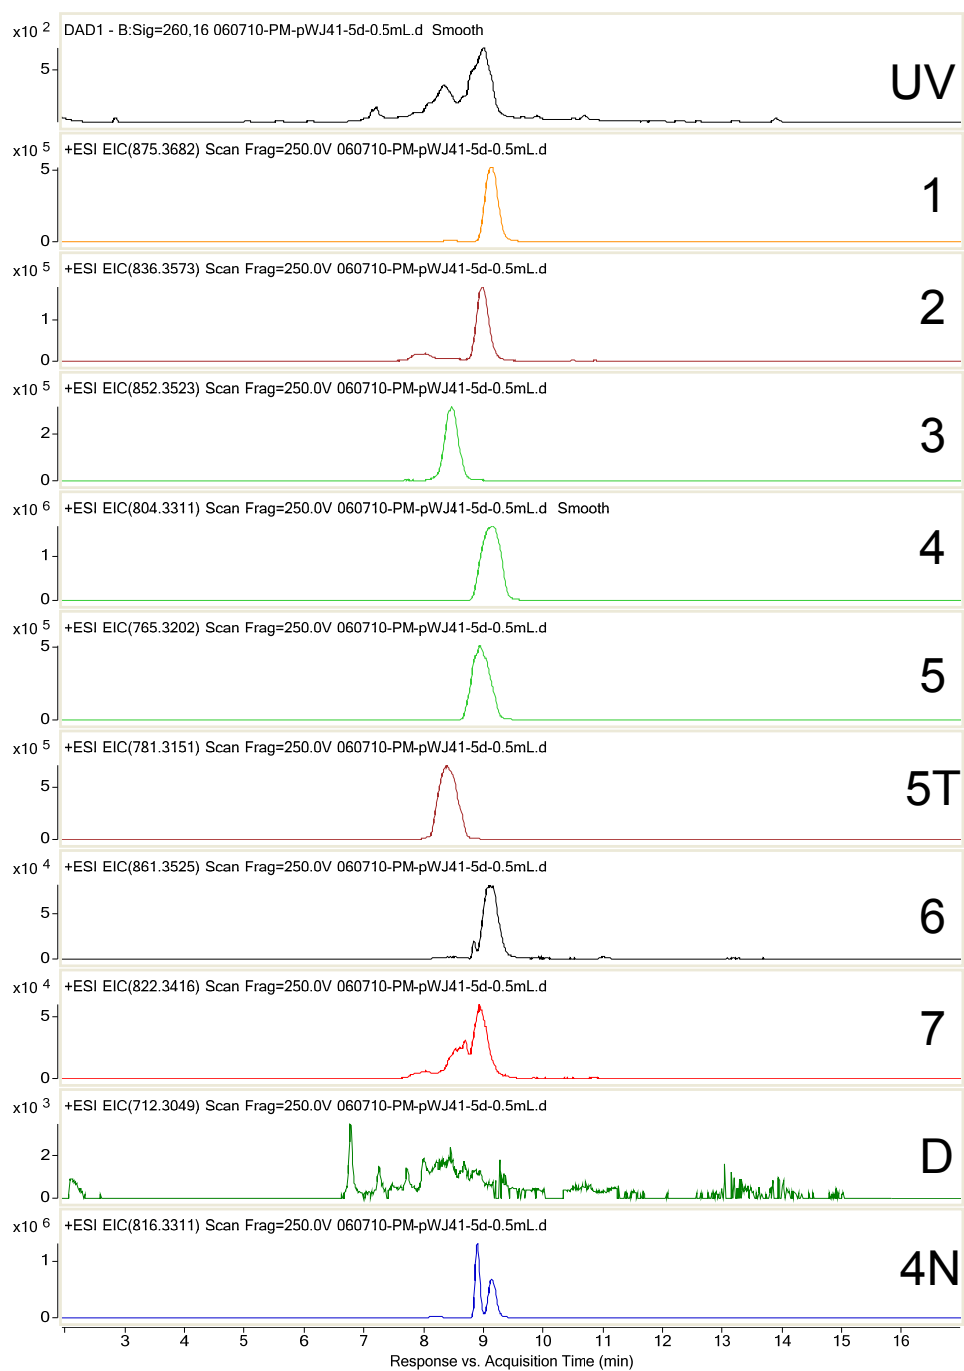

**Fig. S11.** Extracted ion chromatograms of pacidamycins extracted from culture of  $\Delta pacU$  mutant.



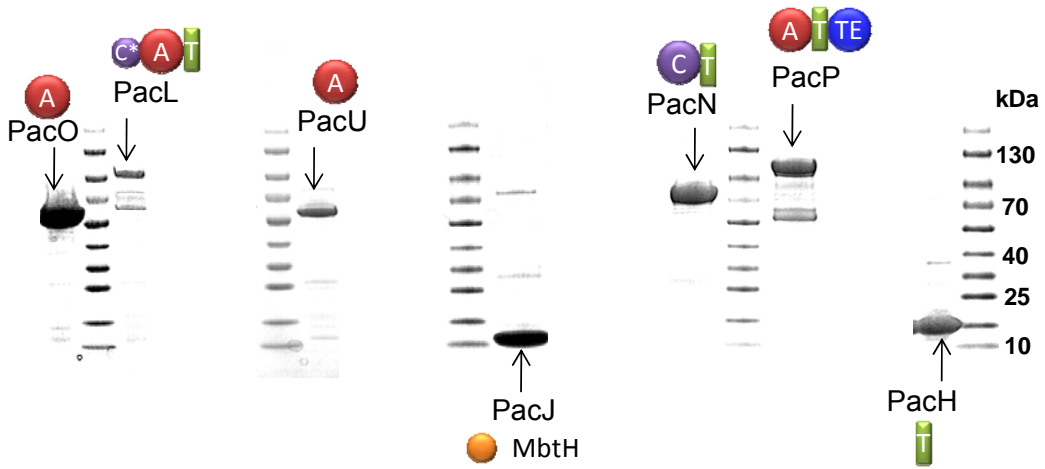

**Fig. S12.** SDS-PAGE analysis of the *E. coli* purified proteins. Most proteins have *N*-terminal hexahistidine tag except that PacJ has a *C*-terminal hexahistidine tag.

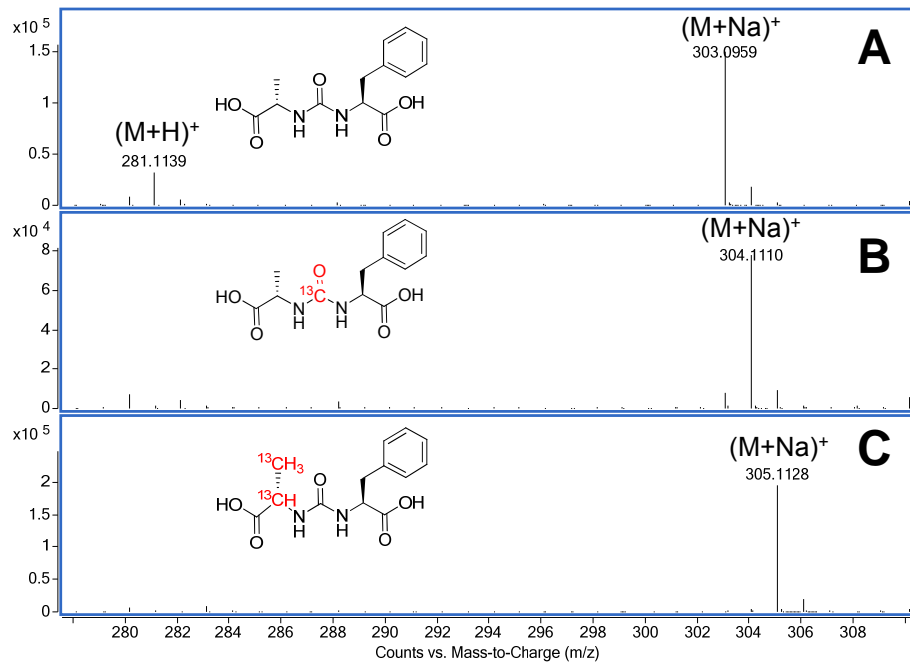

| Panel | $t_R$ | Ion  | Exp $m/z$ | Obz $m/z$        | $\Delta$ mmu |
|-------|-------|------|-----------|------------------|--------------|
| A     | 14.34 | M+H  | 281.1132  | 281.1139         | 0.7          |
|       |       | M+Na | 303.0951  | 303.0959         | 0.8          |
| B     | 14.43 | M+H  |           | <i>not found</i> |              |
|       |       | M+Na | 304.0985  | 304.1110         | 12.5         |
| C     | 14.38 | M+H  |           | <i>not found</i> |              |
|       |       | M+Na | 305.1019  | 305.1128         | 10.9         |

**Fig. S13.** HRMS of the unlabeled and  $^{13}\text{C}$ -labeled Ala-CO-Phe ureido dipeptide.

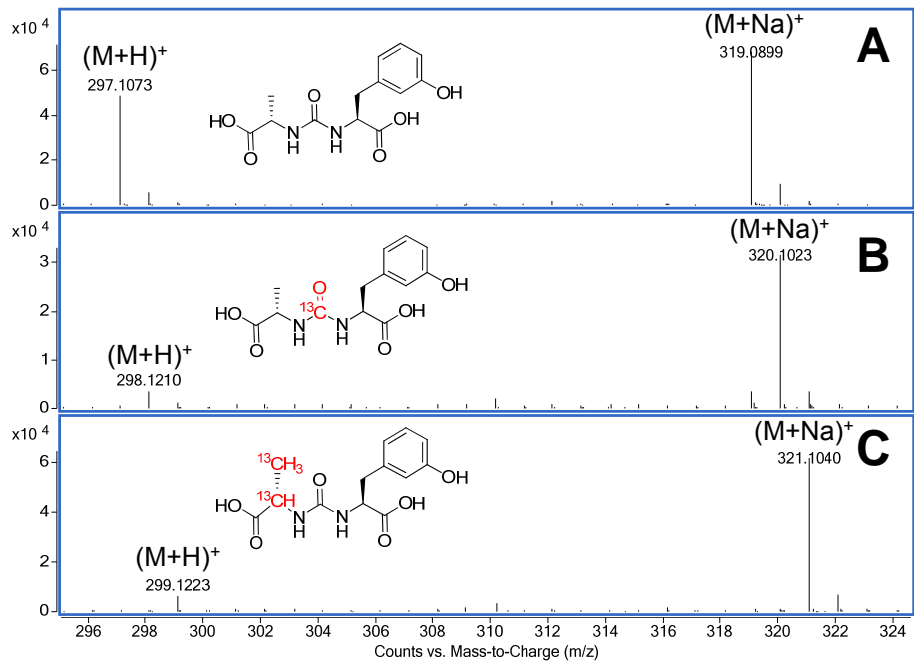

| Panel | $t_R$ | Ion                                      | Exp $m/z$ | Obz $m/z$ | $\Delta$ mmu |
|-------|-------|------------------------------------------|-----------|-----------|--------------|
| A     | 11.76 | M+H                                      | 297.1081  | 297.1073  | -0.8         |
|       |       | M+Na                                     | 319.0901  | 319.0899  | -0.2         |
| B     | 11.79 | M+H                                      | 298.1115  | 298.1210  | 9.5          |
|       |       | NaH <sup>13</sup> CO <sub>3</sub>        | M+Na      | 320.0934  | 320.1023     |
| C     | 11.82 | M+H                                      | 299.1148  | 299.1223  | 7.5          |
|       |       | Ala (2,3- <sup>13</sup> C <sub>2</sub> ) | M+Na      | 321.0968  | 321.1040     |

**Fig. S14.** HRMS of the unlabeled and [<sup>13</sup>C]-labeled Ala-CO-*m*-Tyr ureido dipeptide.
